# Supplementary material for: Enhancing optical, dielectric, and thermal properties of bio-based polyimides incorporating isomannide with a bent and sterically constrained conformation
Source: Royal Society of Chemistry journal article supplement (doi:10.1039/d3tc02933f), 2023-01-01
Supplement: d3tc02933f1.pdf [file d3tc02933f1.pdf]

## Supporting Information

# Enhancing Optical, Dielectric, and Thermal Properties of Bio-based Polyimides Incorporating Isomannide with Bent and Sterically Constrained Conformation

Ririka Sawada and Shinji Ando\*

Department of Chemical Science and Engineering, Tokyo Institute of Technology,

Ookayama 2-12-1-E4-5, Meguro-ku, Tokyo 152-8552, Japan

\*Email: [ando.s.aa@m.titech.ac.jp](mailto:ando.s.aa@m.titech.ac.jp) Phone: +81-3-5734-2137

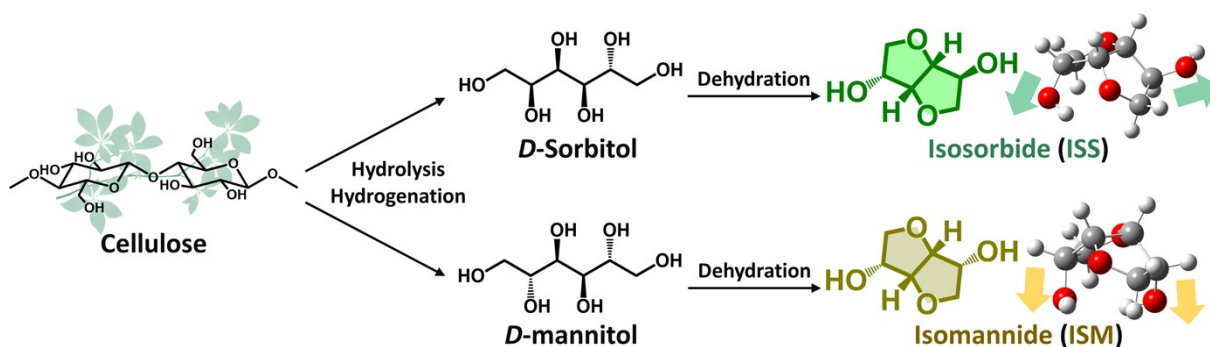

**Figure S1.** Synthetic scheme and chemical structures of isosorbide (ISS) and isomannide (ISM).

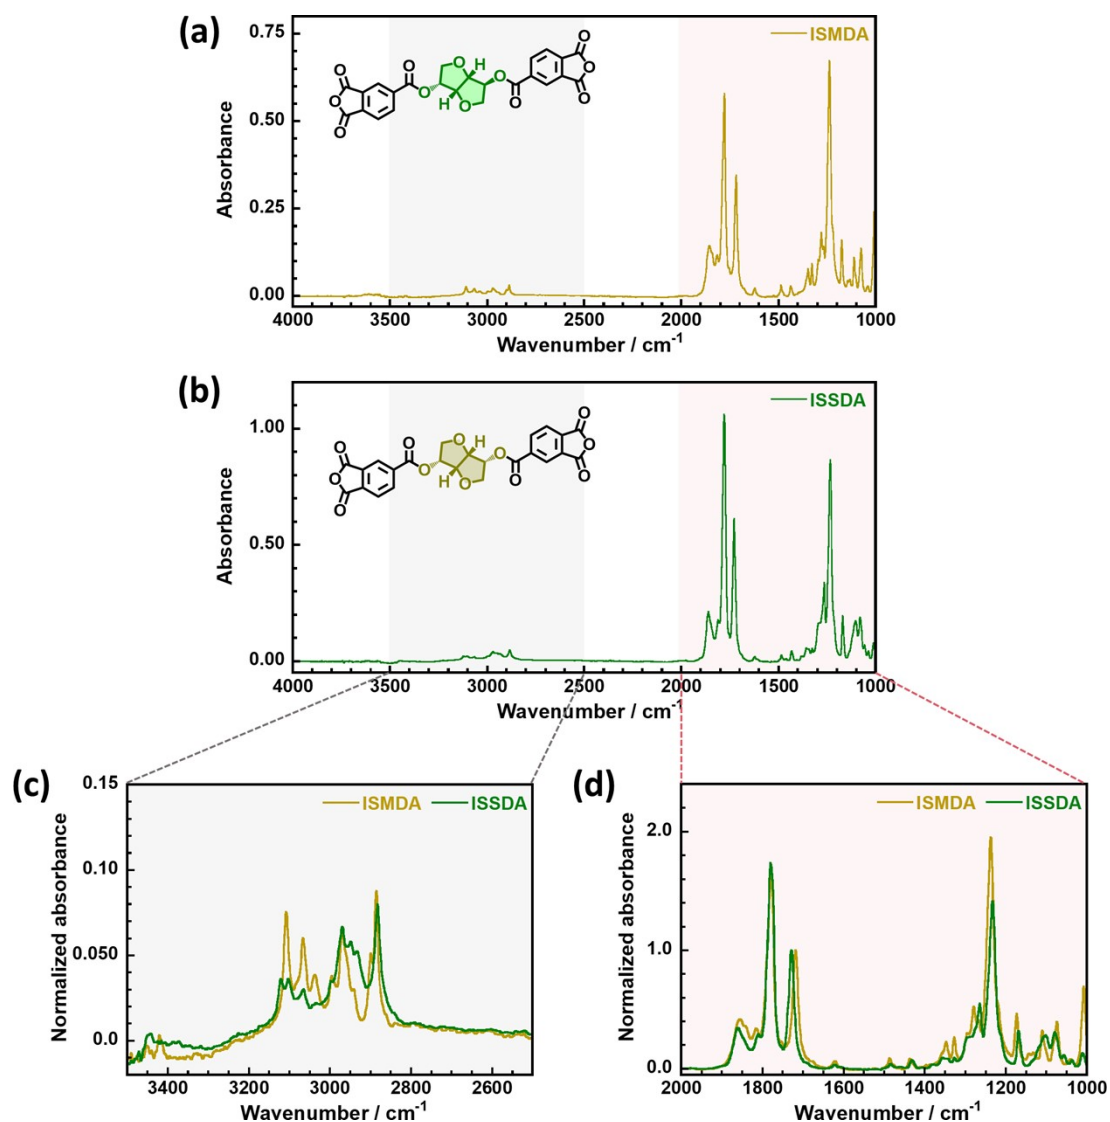

**Figure S2.** Infrared (IR) spectra of (a) ISMDA and (b) ISSDA by KBr method, and the partial IR spectra at (c) 2500–3500 cm<sup>-1</sup> and (d) 1000–2000 cm<sup>-1</sup>.

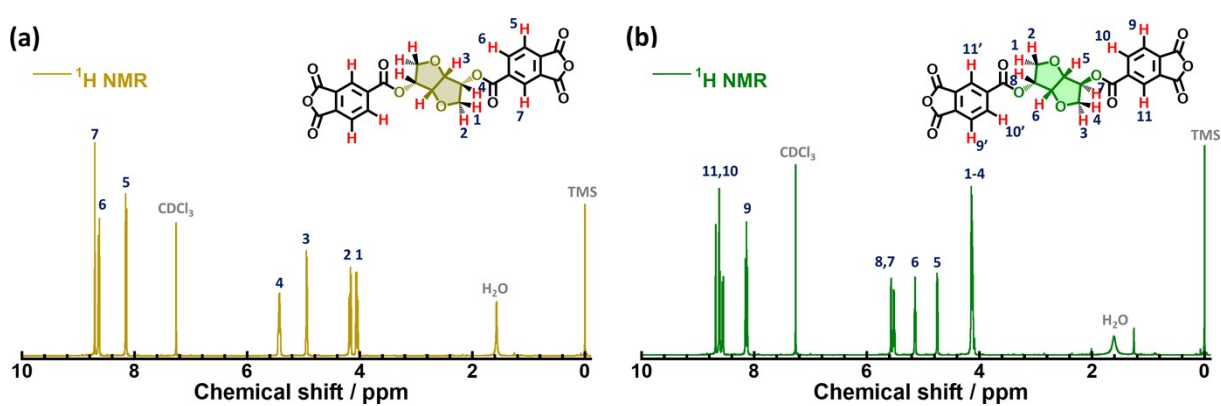

**Figure S3.** <sup>1</sup>H NMR spectra of (a) ISMDA and (b) ISSDA dissolved in chloroform-*d*.

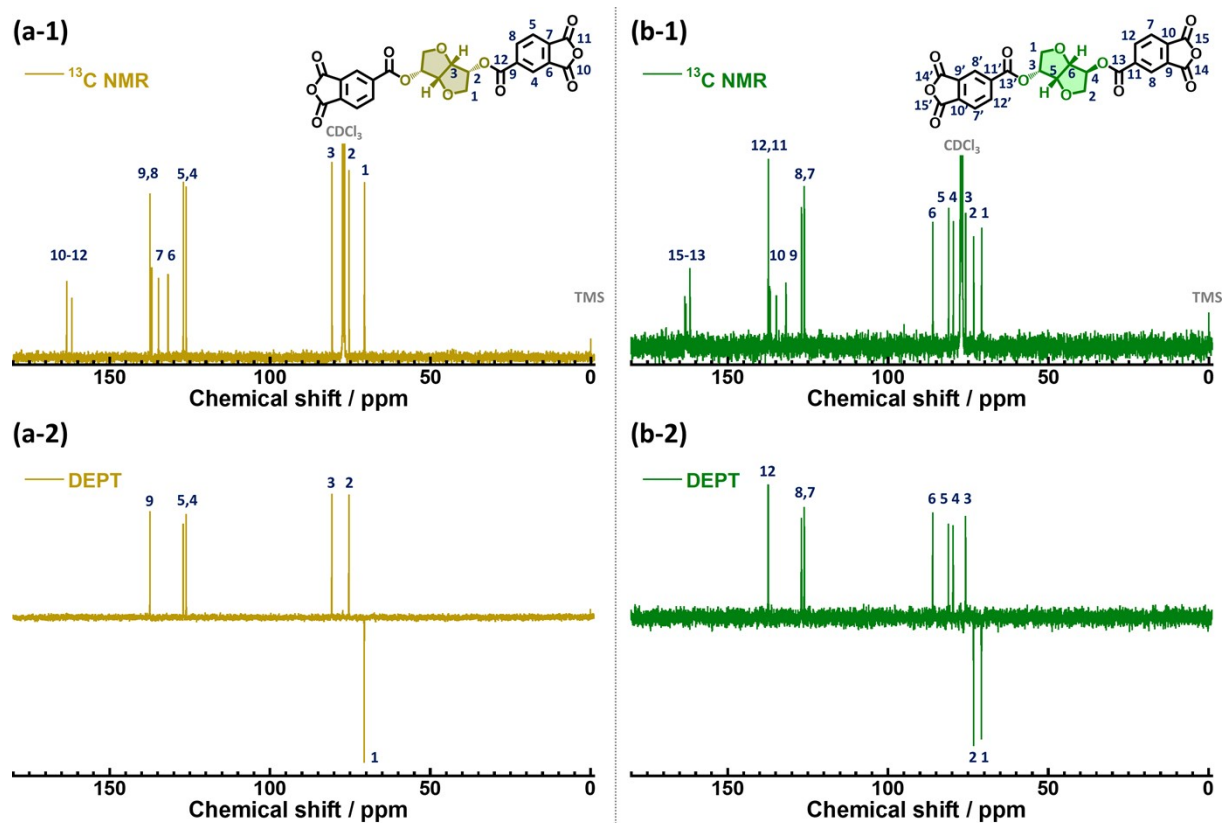

**Figure S4.**  $^{13}\text{C}$  NMR and DEPT spectra of (a) ISMDA and (b) ISSDA dissolved in chloroform-*d*.

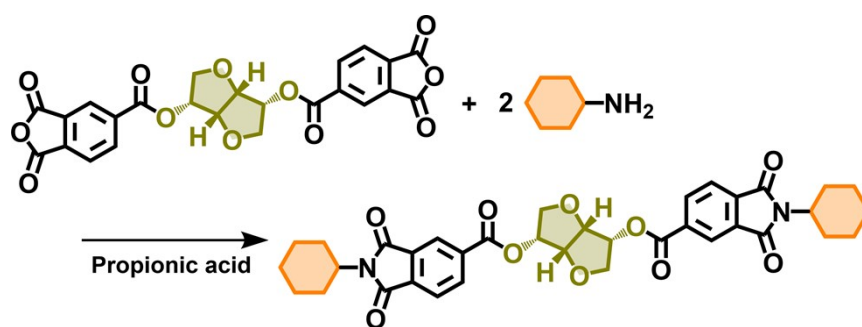

**Scheme S1.** Synthetic scheme of ISM-2Ch (model compound, MC).

**Table S1.** Labels of copolyimides (CoPIs), feed compositions of source materials, and molar contents of ISM ( $C_m$ ).

| <b>Copolyimide</b>                 | <b>Molar ratio<br/>(ISS:ISM)</b> | <b>ISSDA<br/>/mmol</b> | <b>ISMDA<br/>/mmol</b> | <b>TFDB<br/>/mmol</b> | <b>Molar content of<br/>ISM, <math>C_m</math> / %</b> |
|------------------------------------|----------------------------------|------------------------|------------------------|-----------------------|-------------------------------------------------------|
| ISS <sub>9</sub> -ISM <sub>1</sub> | 9:1                              | 0.72                   | 0.08                   | 0.8                   | 10                                                    |
| ISS <sub>8</sub> -ISM <sub>2</sub> | 8:2                              | 0.64                   | 0.16                   | 0.8                   | 20                                                    |
| ISS <sub>7</sub> -ISM <sub>3</sub> | 7:3                              | 0.56                   | 0.24                   | 0.8                   | 30                                                    |
| ISS <sub>6</sub> -ISM <sub>4</sub> | 6:4                              | 0.48                   | 0.32                   | 0.8                   | 40                                                    |
| ISS <sub>5</sub> -ISM <sub>5</sub> | 5:5                              | 0.40                   | 0.40                   | 0.8                   | 50                                                    |

(a) ISS<sub>9</sub>-ISM<sub>1</sub>

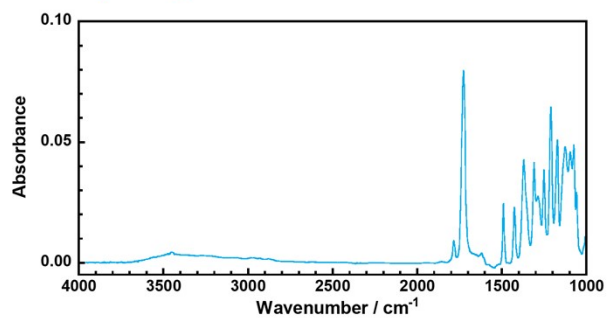

(b) ISS<sub>8</sub>-ISM<sub>2</sub>

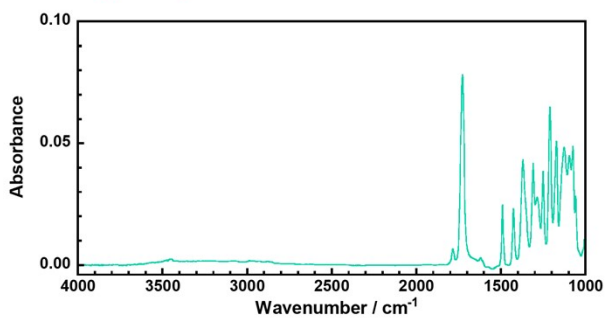

(c) ISS<sub>7</sub>-ISM<sub>3</sub>

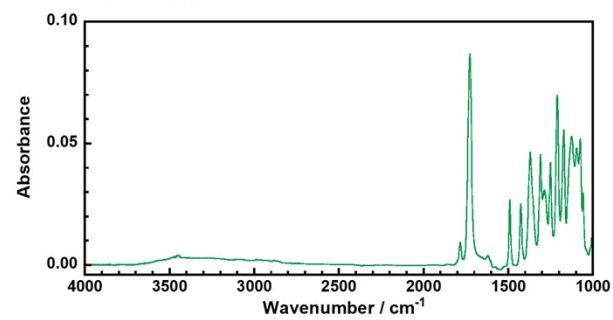

(d) ISS<sub>6</sub>-ISM<sub>4</sub>

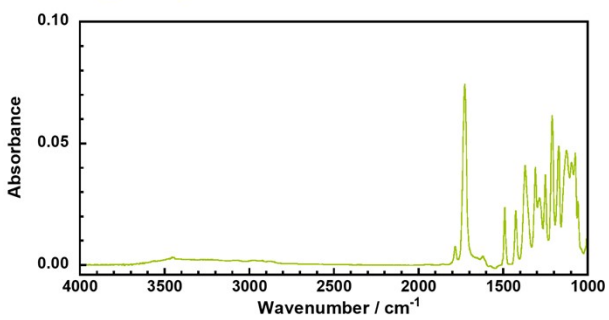

(e) ISS<sub>5</sub>-ISM<sub>5</sub>

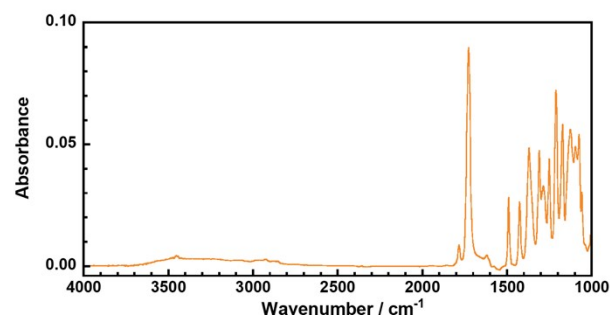

Figure S5. FT-IR spectra of CoPI films obtained by the ATR method.

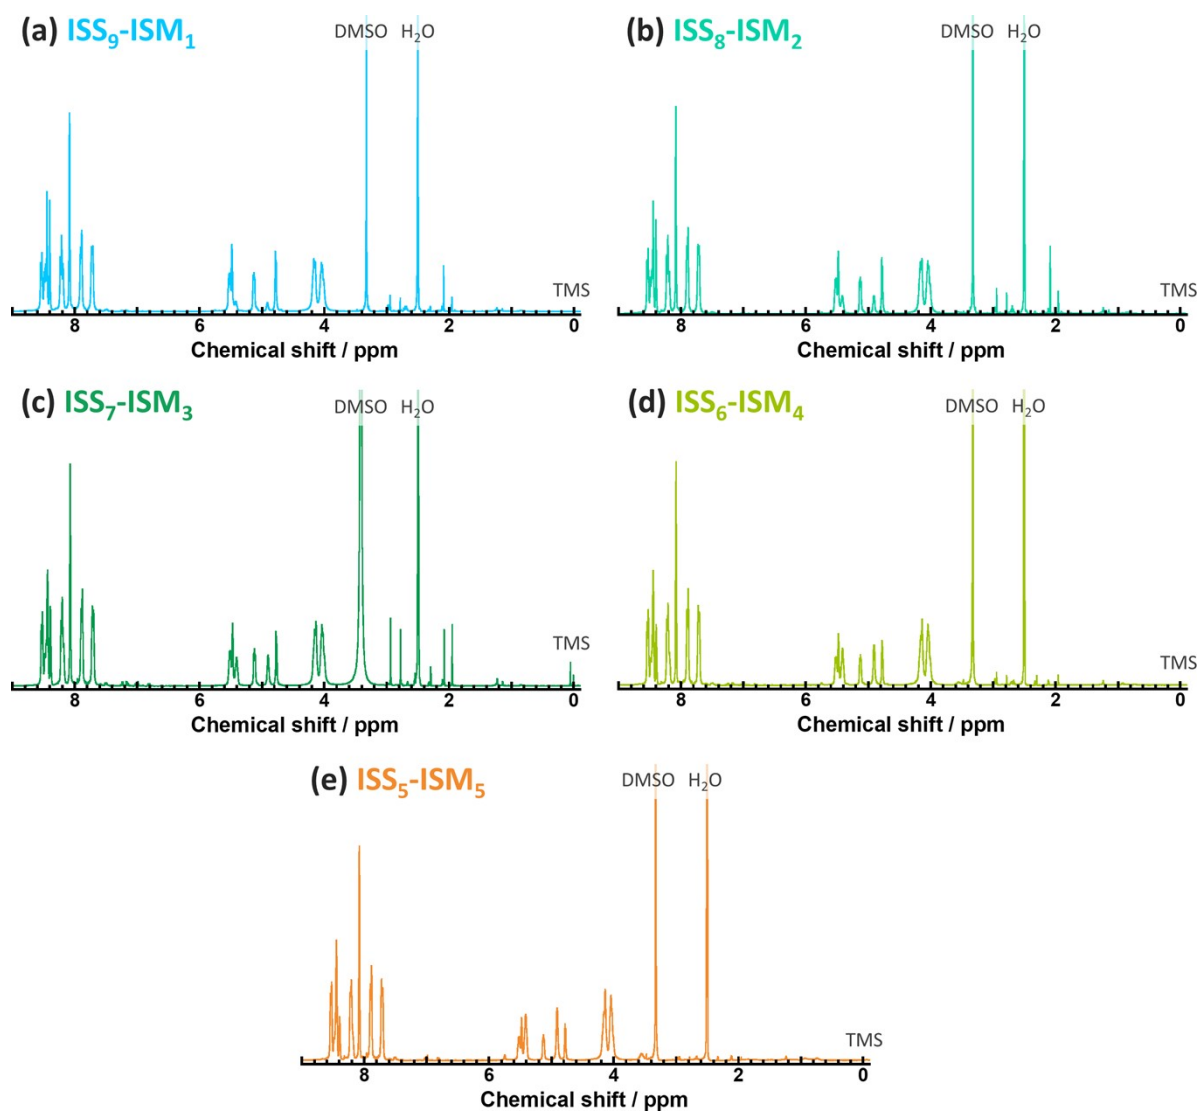

Figure S6.  $^1H$  NMR spectra of CoPIs dissolved in  $DMSO-d_6$ .

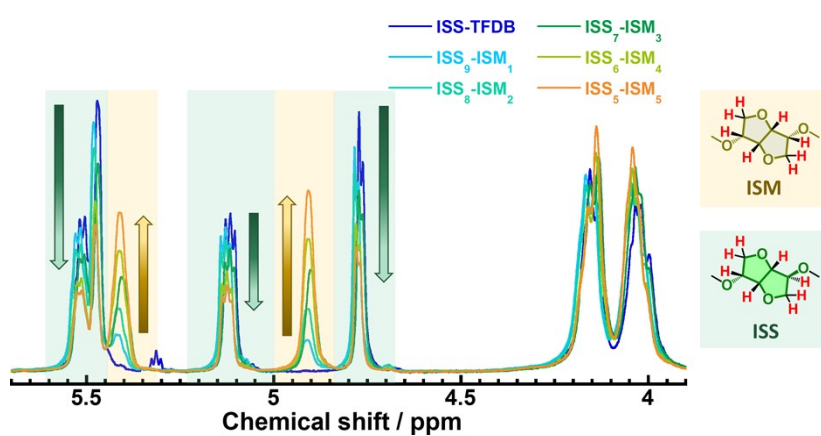

Figure S7. Spectral changes of  $^1H$  NMR spectra of CoPIs dissolved in  $DMSO-d_6$  with an increase in the molar content of ISM.

**Table S2.** Signal intensities of the characteristic  $^1\text{H}$  NMR peaks assignable to ISS and ISM of CoPIs in **Figure S7**, and the molar contents of ISM ( $C_m$ ) estimated from NMR spectra. The signal intensities are normalized with that of the aromatic signal resonated at  $\delta = 8.04$  ppm.

| Copolyimide                        | ISS          |              | ISM            | Molar content of ISM, $C_m$ by NMR / % |
|------------------------------------|--------------|--------------|----------------|----------------------------------------|
|                                    | (a) 4.77 ppm | (c) 5.11 ppm | (b) 4.87 ppm * |                                        |
| ISS-TFDB                           | 1.01         | 1.00         | –              | 0.0                                    |
| ISS <sub>9</sub> -ISM <sub>1</sub> | 0.90         | 0.90         | 0.09           | 9.0                                    |
| ISS <sub>8</sub> -ISM <sub>2</sub> | 0.81         | 0.81         | 0.19           | 19.0                                   |
| ISS <sub>7</sub> -ISM <sub>3</sub> | 0.72         | 0.71         | 0.29           | 28.8                                   |
| ISS <sub>6</sub> -ISM <sub>4</sub> | 0.58         | 0.59         | 0.41           | 41.2                                   |
| ISS <sub>5</sub> -ISM <sub>5</sub> | 0.48         | 0.49         | 0.50           | 50.8                                   |

\* As the ISM signal contains two types of protons, half of the signal intensities are shown to estimate the ISM content.

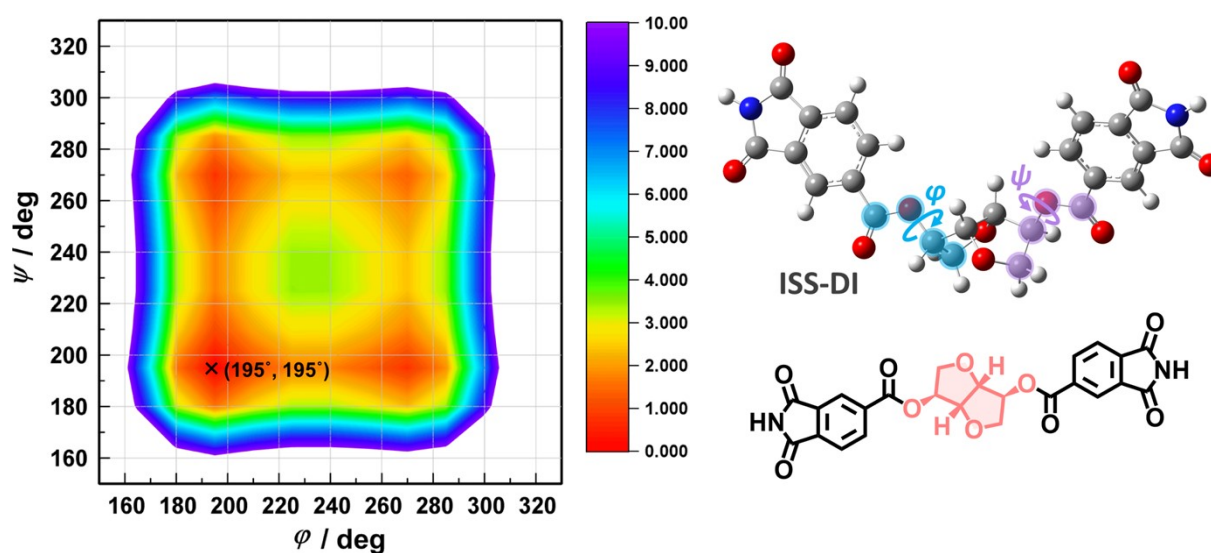

**Figure S8.** Calculated conformational energy surface and the optimized conformation of ISI-DI.

(a) ISM-et-DI

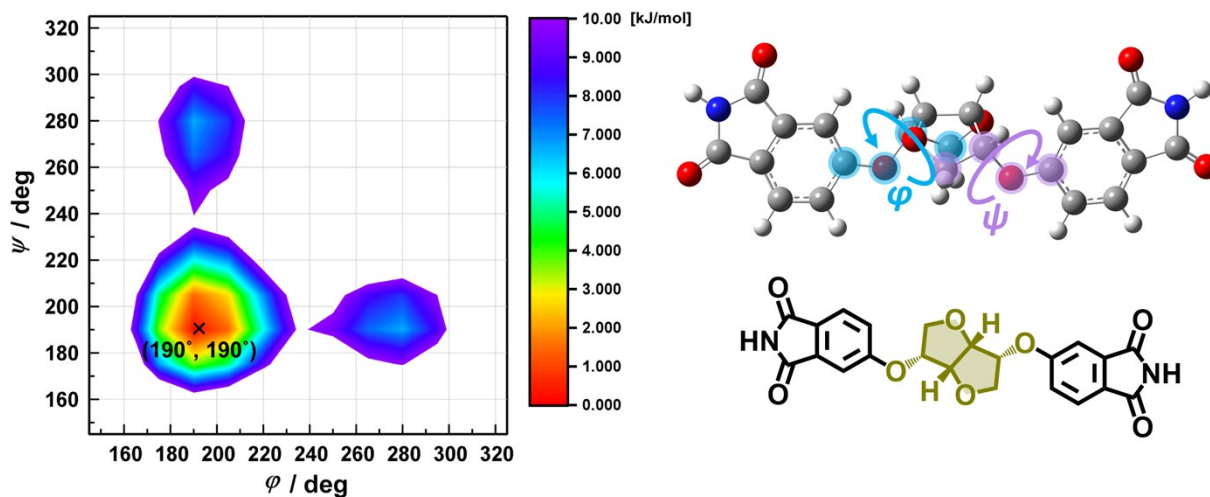

(b) ISS-et-DI

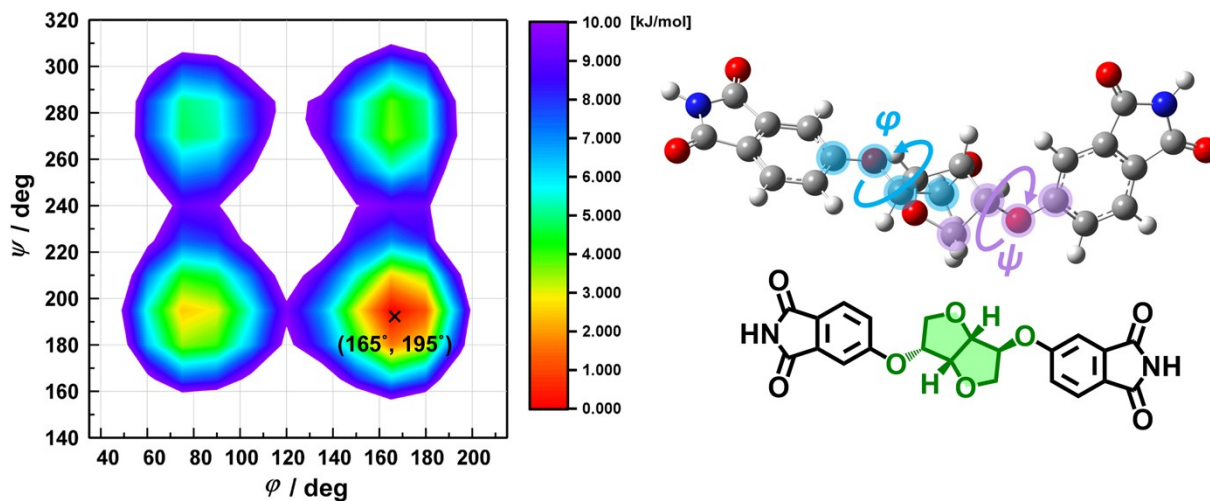

(c) ISI-et-DI

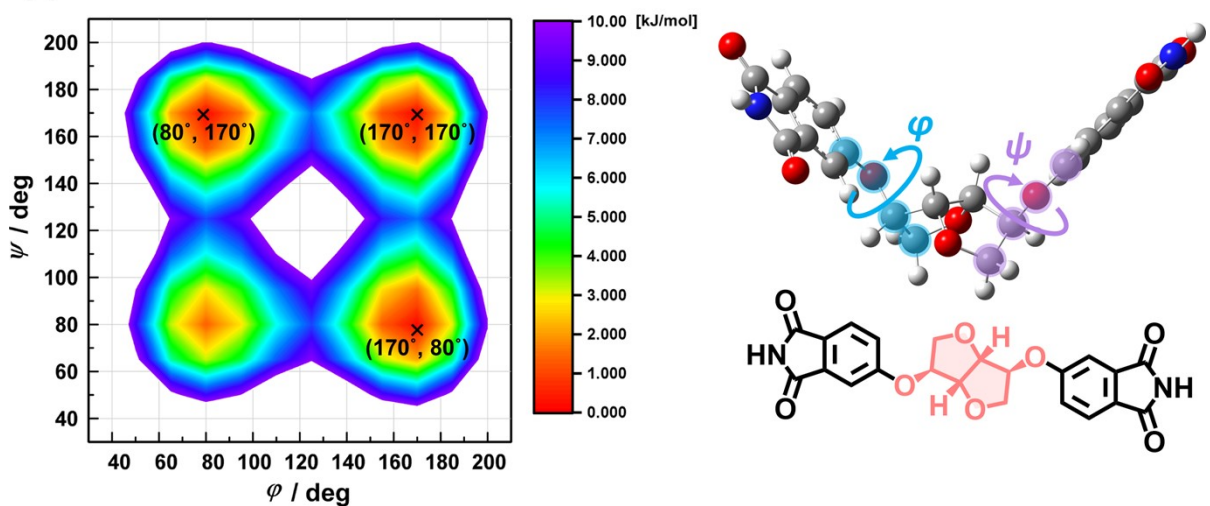

**Figure S9.** Calculated conformational energy surfaces and the optimized conformations of (a) ISM-et-DI, (b) ISS-et-DI, and (c) ISI-et-DI.



(a) ISS<sub>9</sub>-ISM<sub>1</sub>

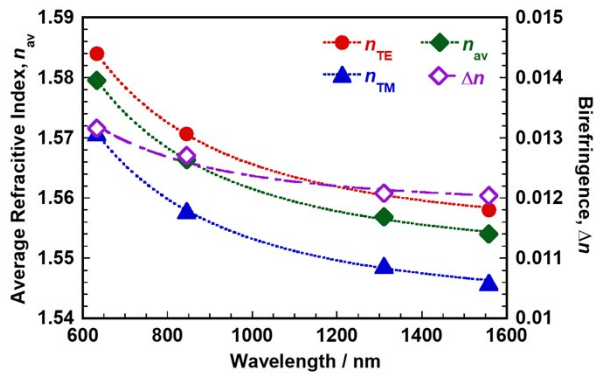

(b) ISS<sub>8</sub>-ISM<sub>2</sub>

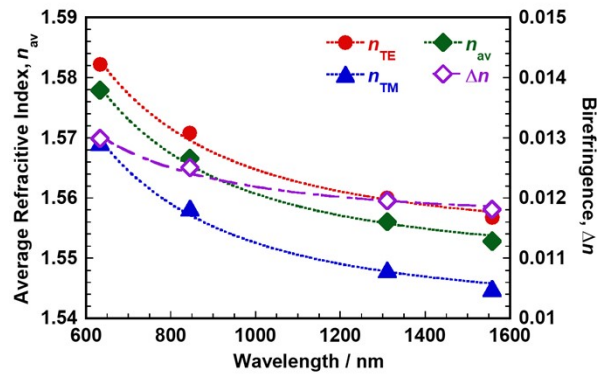

(c) ISS<sub>7</sub>-ISM<sub>3</sub>

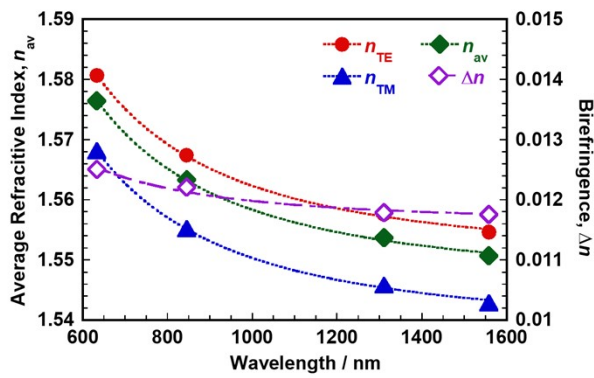

(d) ISS<sub>6</sub>-ISM<sub>4</sub>

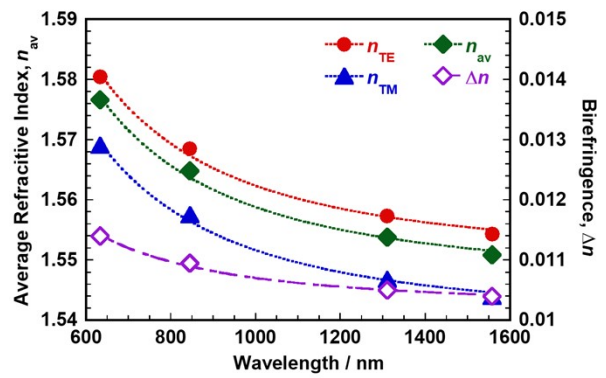

(e) ISS<sub>5</sub>-ISM<sub>5</sub>

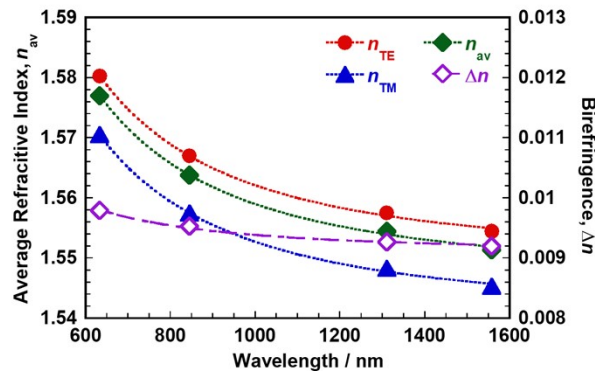

**Figure S10.** Experimental wavelength dispersions of refractive indices ( $n_{TE}$ ,  $n_{TM}$ ,  $n_{av}$ ) and in-plane/out-of-plane birefringence ( $\Delta n$ ) of ISS-PI films fitted by the simplified Cauchy's dispersion formula.

**Table S3.** Experimental in-plane, out-of-plane, and average refractive indices ( $n_{TE}$ ,  $n_{TM}$ , and  $n_{av}$ , respectively) and birefringence ( $\Delta n$ ) of ISS-TFDB (HomoPI) and CoPIs measured at 1310 nm, and the fitted parameters of wavelength dispersion ( $n_{\infty}$ ,  $B_n$ )

| Polyimide                          | $n_{TE}$ | $n_{TM}$ | $n_{av}$ | $\Delta n$ | $n_{\infty}$ | $B_n^a$ |
|------------------------------------|----------|----------|----------|------------|--------------|---------|
| ISS-TFDB (HomoPI) <sup>1</sup>     | 1.5597   | 1.5467   | 1.5554   | 0.0130     | 1.5475       | 12875   |
| ISS <sub>9</sub> -ISM <sub>1</sub> | 1.5609   | 1.5488   | 1.5569   | 0.0121     | 1.5494       | 12115   |
| ISS <sub>8</sub> -ISM <sub>2</sub> | 1.5601   | 1.5481   | 1.5561   | 0.0120     | 1.5489       | 11878   |
| ISS <sub>7</sub> -ISM <sub>3</sub> | 1.5576   | 1.5459   | 1.5537   | 0.0118     | 1.5462       | 12168   |
| ISS <sub>6</sub> -ISM <sub>4</sub> | 1.5573   | 1.5468   | 1.5538   | 0.0105     | 1.5465       | 12289   |
| ISS <sub>5</sub> -ISM <sub>5</sub> | 1.5575   | 1.5483   | 1.5545   | 0.0093     | 1.5469       | 12089   |

<sup>a</sup> Unit: nm<sup>2</sup>.

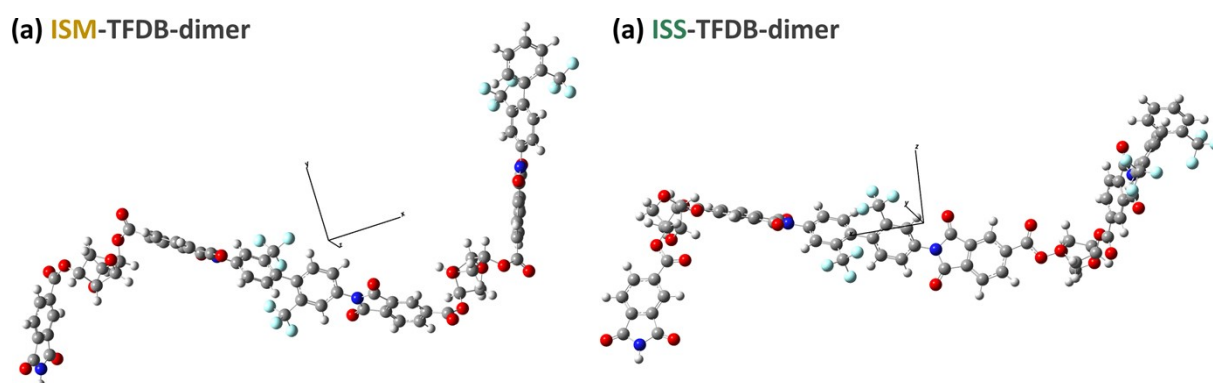

**Figure S11.** Optimized conformations and the principal axes of polarizability tensor of dimer model compounds (MCs) of ISM-TFDB and ISS-TFDB.

(a) ISS<sub>9</sub>-ISM<sub>1</sub>

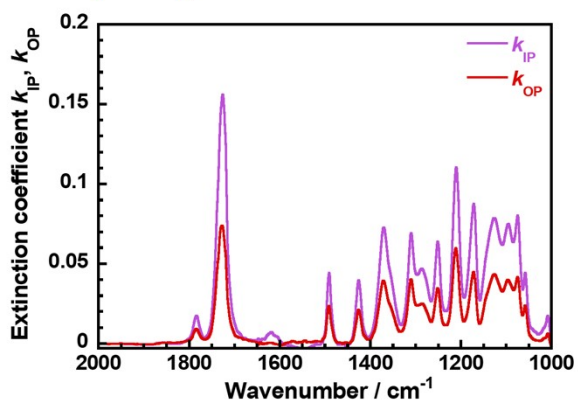

(b) ISS<sub>8</sub>-ISM<sub>2</sub>

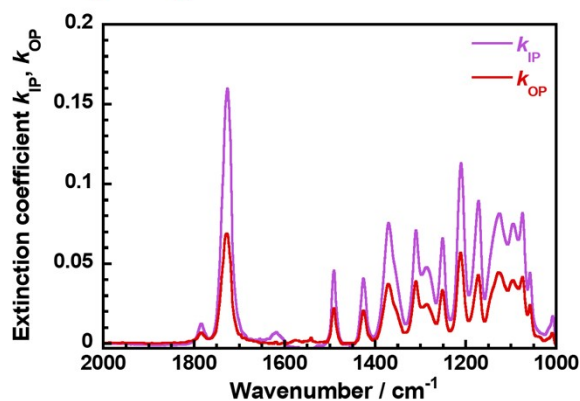

(c) ISS<sub>7</sub>-ISM<sub>3</sub>

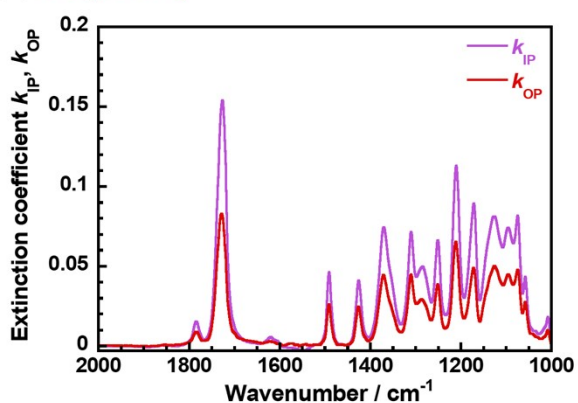

(d) ISS<sub>6</sub>-ISM<sub>4</sub>

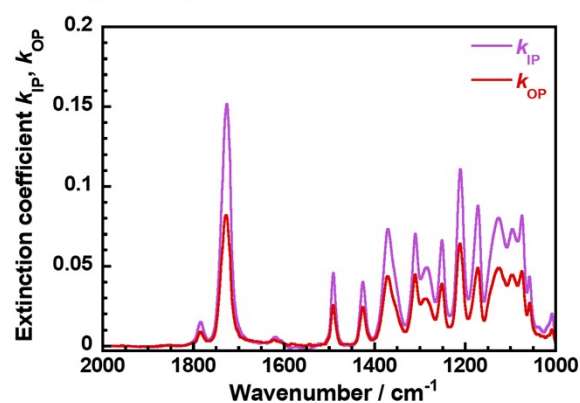

(e) ISS<sub>5</sub>-ISM<sub>5</sub>

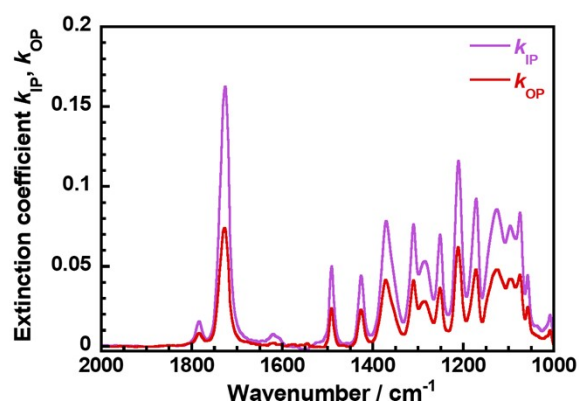

**Figure S12.** In-plane and out-of-plane extinction coefficient ( $k_{IP}$ ,  $k_{OP}$ ) spectra of CoPIs obtained by the polarized ATR-FT-IR method.

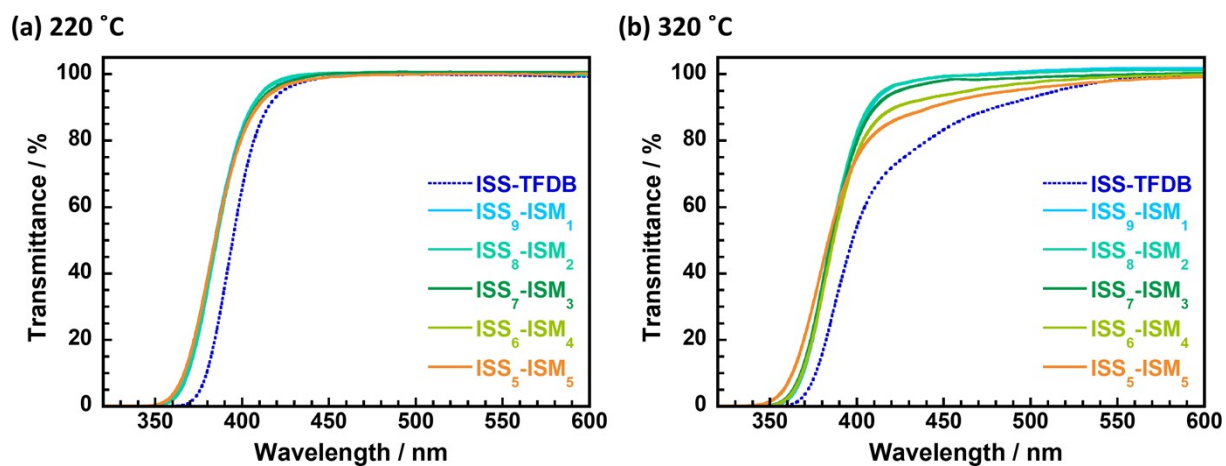

Figure S13. UV-vis transmission spectra of CoPI films.

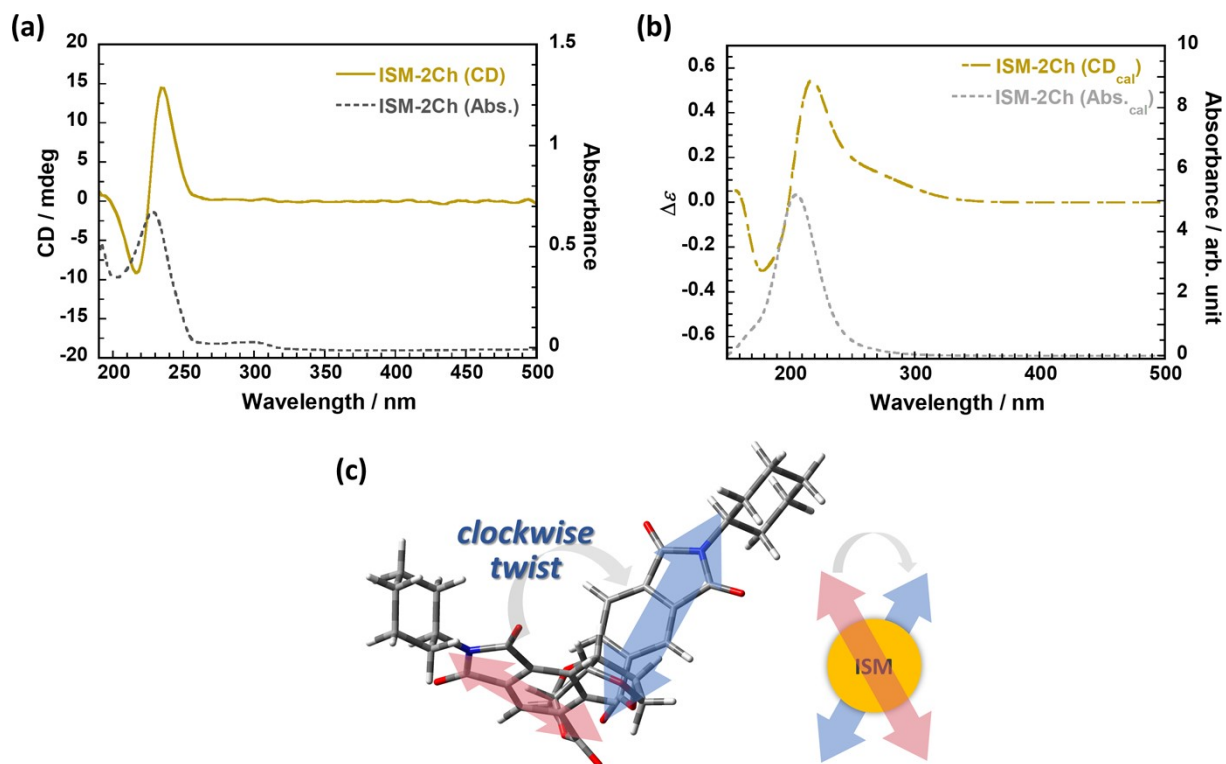

Figure S14. (a) Experimental and (b) calculated UV-vis circular dichroism (CD) spectra, and (c) the optimized structure and absolute configuration corresponding to the transition dipoles of a model compound (ISM-2Ch).

**Table S4.** Film thickness ( $d$ ), dielectric constants ( $D_k$ ), dissipation factors ( $D_f$ ), and contributions of dipolar polarization ( $P_d$ ) at 10 and 20 GHz.

| Polyimide                          | $d / \mu\text{m}$ | $D_k$  |        | $D_f$   |        | $P_d^a$ |        |
|------------------------------------|-------------------|--------|--------|---------|--------|---------|--------|
|                                    |                   | 10 GHz | 20 GHz | 10 GHz  | 20 GHz | 10 GHz  | 20 GHz |
| ISS-TFDB <sup>1</sup>              | 17.2              | 2.97   | 2.94   | 0.0105  | 0.0124 | 0.0752  | 0.0716 |
| ISS <sub>9</sub> -ISM <sub>1</sub> | 18.0              | 2.95   | 2.90   | 0.00928 | 0.0116 | 0.0721  | 0.0659 |
| ISS <sub>8</sub> -ISM <sub>2</sub> | 16.0              | 2.95   | 2.89   | 0.00988 | 0.0118 | 0.0725  | 0.0650 |
| ISS <sub>7</sub> -ISM <sub>3</sub> | 26.0              | 2.92   | 2.86   | 0.00982 | 0.0119 | 0.0699  | 0.0624 |
| ISS <sub>6</sub> -ISM <sub>4</sub> | 17.0              | 3.02   | 2.96   | 0.0104  | 0.0128 | 0.0820  | 0.0748 |
| ISS <sub>5</sub> -ISM <sub>5</sub> | 9.5               | 2.99   | 2.97   | 0.0107  | 0.0131 | 0.0769  | 0.0757 |

<sup>a</sup> Estimated using Eq. (8).

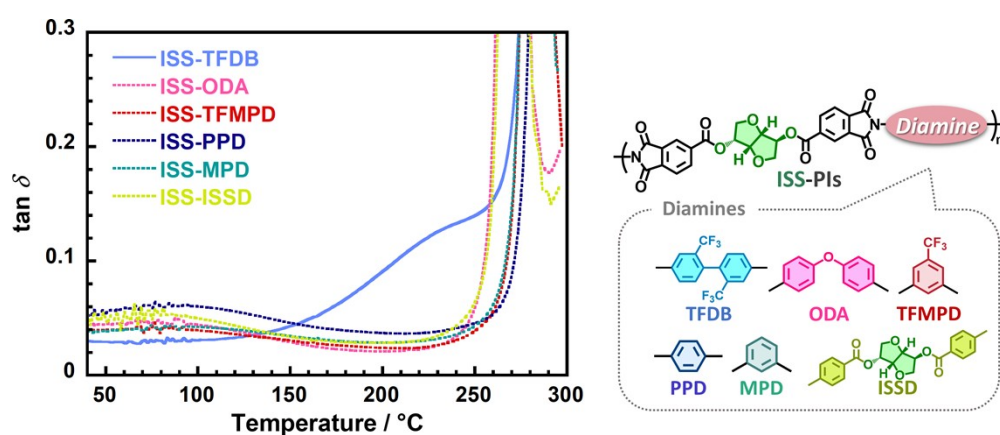

**Figure S15.** DMA curves of ISS-PIs derived from ISSDA dianhydride and six kinds of diamines.

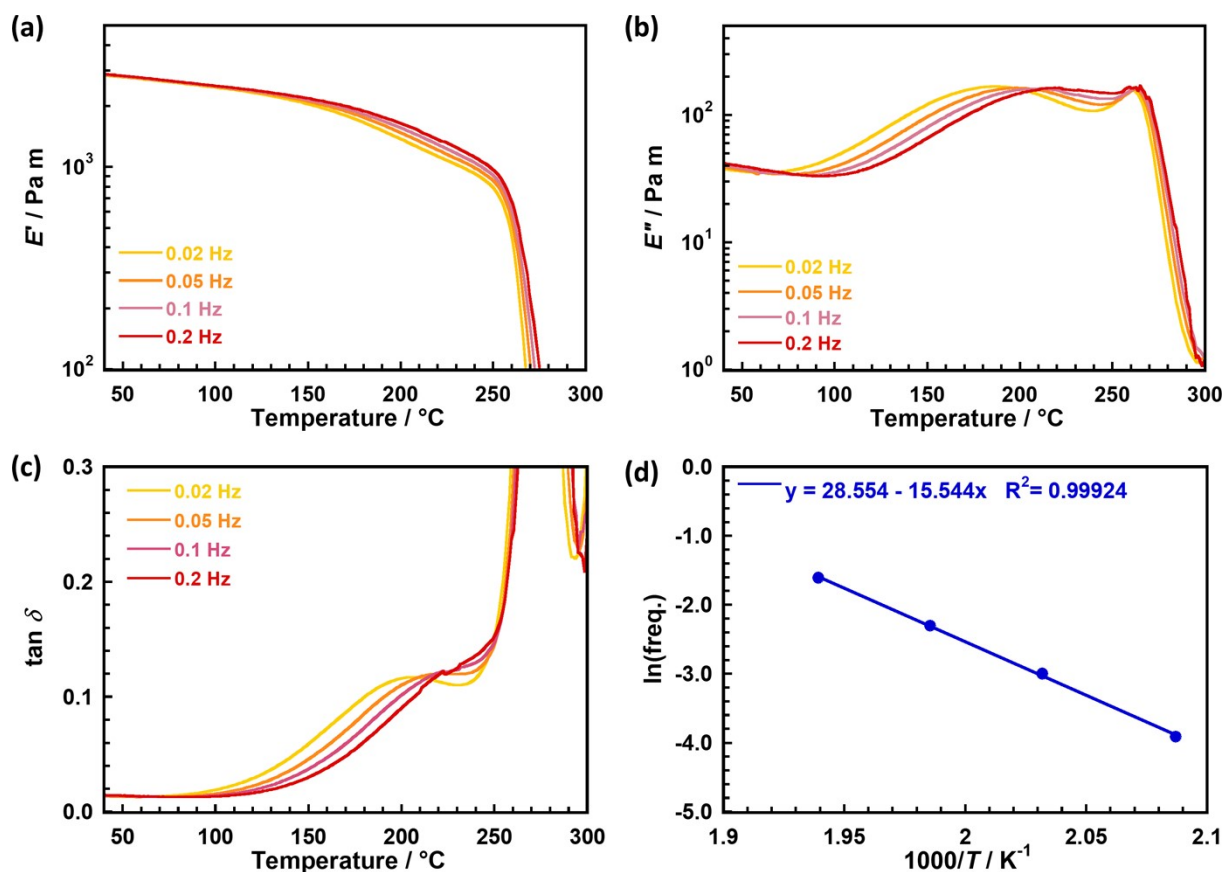

**Figure S16.** Temperature dependence of (a) storage modulus ( $E'$ ), (b) loss modulus ( $E''$ ), (c)  $\tan \delta$ , and (d) Arrhenius plot of ISS-TFDB measured at variable frequencies of 0.02–0.2 Hz.

## Reference

- (1) Sawada, R.; Ando, S. Colorless, Low Dielectric, and Optically Active Semialicyclic Polyimides Incorporating a Biobased Isosorbide Moiety in the Main Chain. *Macromolecules* **2022**, *55* (15), 6787–6800. <https://doi.org/10.1021/acs.macromol.2c01288>.
